# Supplementary material for: Dopaminergic neurons are not a major Sonic hedgehog ligand source for striatal cholinergic or PV interneurons
Source: PubMed Central journal article supplement — iScience. 2022 Oct 7;25(11):105278. doi: 10.1016/j.isci.2022.105278 (PMC9587326; doi:10.1016/j.isci.2022.105278), 2022-10-07
Supplement: mmc1.pdf [file mmc1.pdf]

**iScience, Volume 25**

**Supplemental information**

**Dopaminergic neurons are not a major  
Sonic hedgehog ligand source for striatal  
cholinergic or PV interneurons**

**Flavia Correa Turcato, Elliot Wegman, Tao Lu, Nathan Ferguson, and Yu Luo**

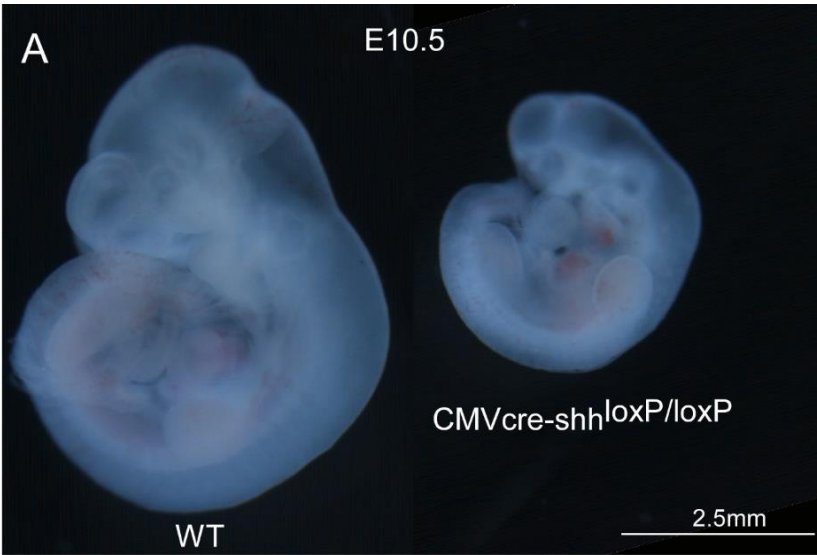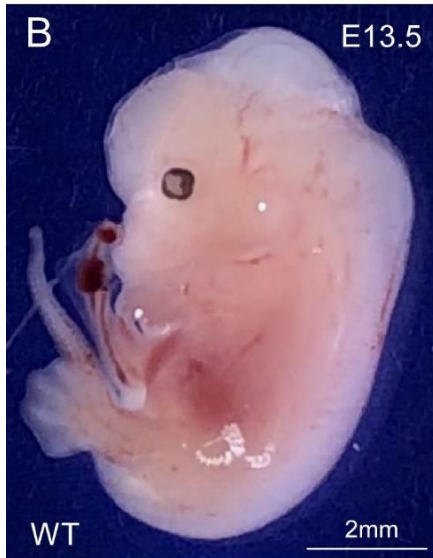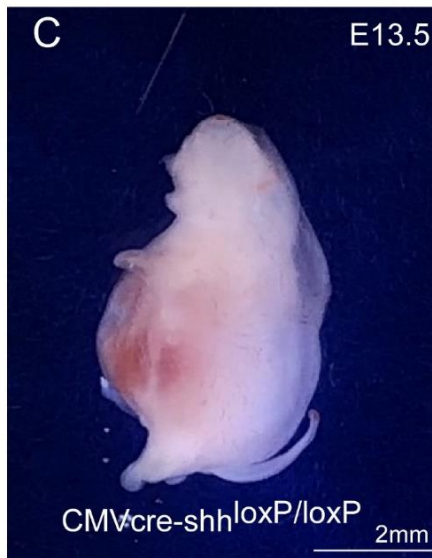

**Supplementary Fig 1 Validation of the *Shh* floxed mice, in relation to Fig 3.** Global deletion of *Shh* mediated by CMV-driven cre in the CMVcre-shh KO mice leads to typical developmental defects in neural tube at embryonic stage E10.5 and E13.5, consistent with previous reports. n>3 for each genotype showed similar phenotype.
